# Supplementary material for: The proprotein convertase PC5/6 is protective against intestinal tumorigenesis: in vivo mouse model
Source: PubMed Central journal article supplement (PMC2746178; doi:10.1186/1476-4598-8-73), 2009-09-08

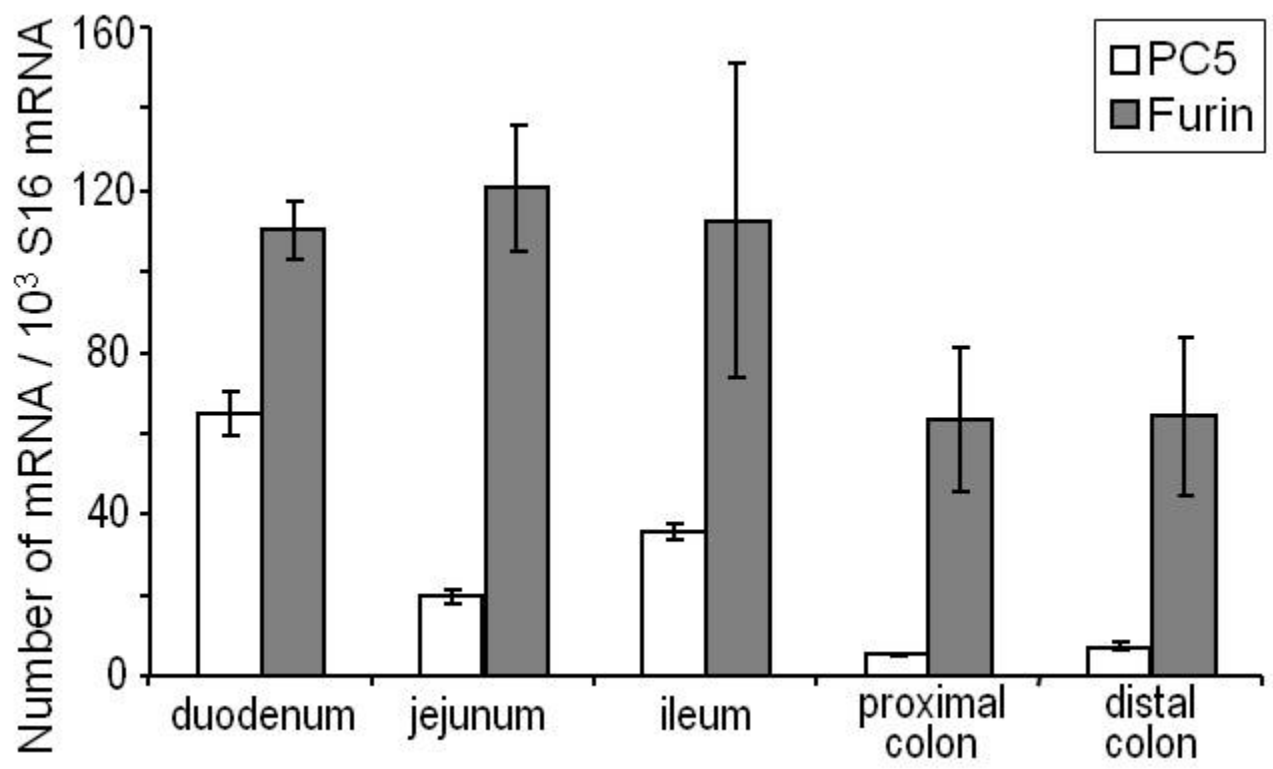

Supplement: 1476-4598-8-73-S4.pdf [file 1476-4598-8-73-S4.pdf]
